# Supplementary material for: Achieving superb sodium storage performance on carbon anodes through an ether-derived solid electrolyte interphase
Source: Royal Society of Chemistry journal article supplement (doi:10.1039/c6ee03367a), 2016-12-14
Supplement: c6ee03367a1.pdf [file c6ee03367a1.pdf]

## Supporting Information

### **Achieving Superb Sodium Storage Performance on Carbon Anodes through Ether-derived Solid Electrolyte Interphase**

Jun Zhang<sup>a,b,‡</sup>, Da-Wei Wang<sup>c,‡</sup>, Wei Lv<sup>b</sup>, Siwei Zhang<sup>b</sup>, Qinghua Liang<sup>b</sup>, Dequn Zheng<sup>b</sup>, Feiyu Kang<sup>a,b</sup> and Quan-Hong Yang<sup>a,b,d,\*</sup>

<sup>a</sup>Tsinghua-Berkeley Shenzhen Institute (TBSI), Tsinghua University, Shenzhen 518055, China.

E-mail: yang.quanhong@sz.tsinghua.edu.cn

<sup>b</sup>Shenzhen Key Laboratory for Graphene-Based Materials and Engineering Laboratory for Functionalized Carbon Materials, Graduate School at Shenzhen, Tsinghua University, Shenzhen 518055, China.

<sup>c</sup>School of Chemical Engineering, The University of New South Wales, Sydney, NSW, 2052, Australia.

<sup>d</sup>School of Chemical Engineering and Technology, Tianjin University, Tianjin 300072, China.

E-mail: qhyangcn@tju.edu.cn

‡These authors are equal main contributors.

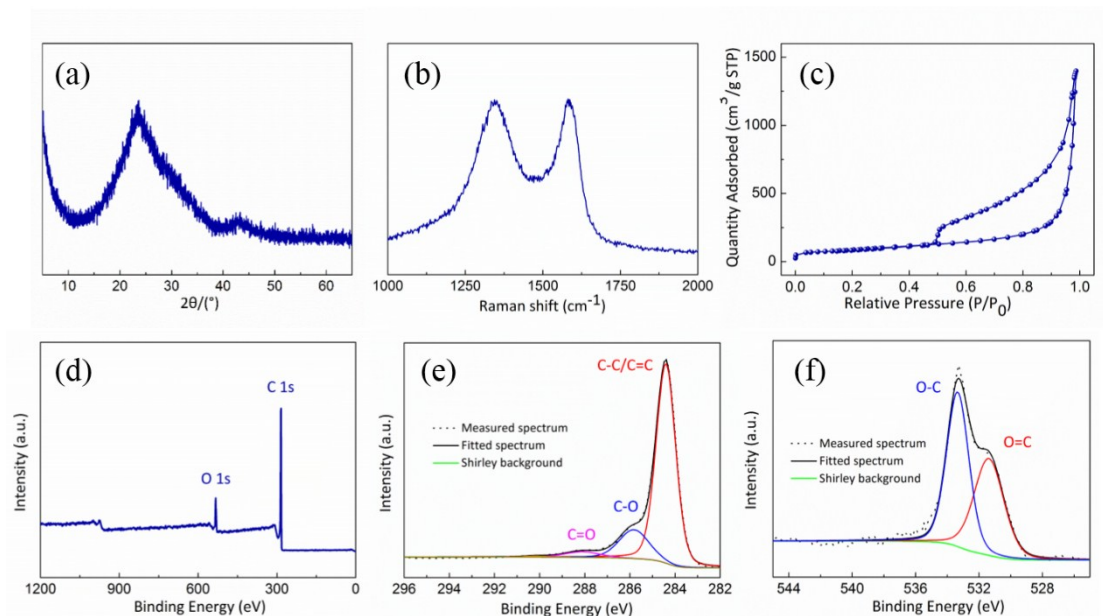

**Figure S1 Systematic characterization of rGO samples.** (a) XRD profile, (b) Raman spectra, (c) N<sub>2</sub> adsorption isotherm, (e) XPS C 1s and (f) XPS O 1s spectrum for rGO samples.

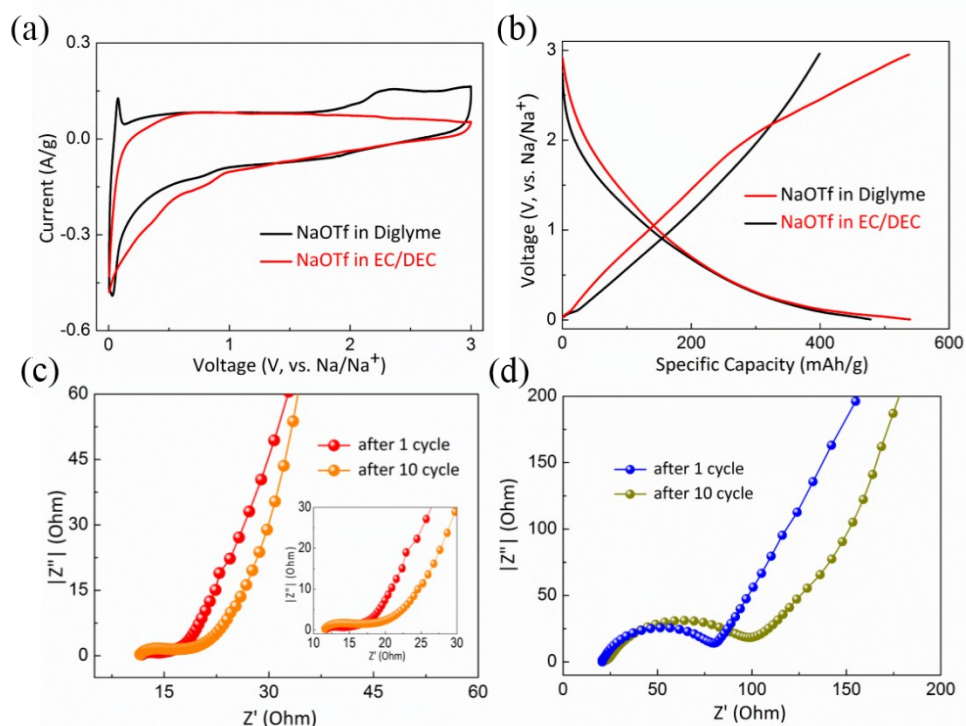

**Figure S2 Comparison of electrochemical performance of rGO electrodes in different solvents.** (a) CV curves of the third cycle for NaOTf in EC/DEC and Diglyme at a scanning rate of 0.2 mV/s. (b) Galvanostatic charge-discharge profiles of the third cycle for NaOTf in EC/DEC and Diglyme at a current density of 0.1 A/g. (c) EIS after 1 cycle and 10 cycles for NaOTf in Diglyme. (d) EIS after 1 cycle and 10 cycles for NaOTf in EC/DEC.

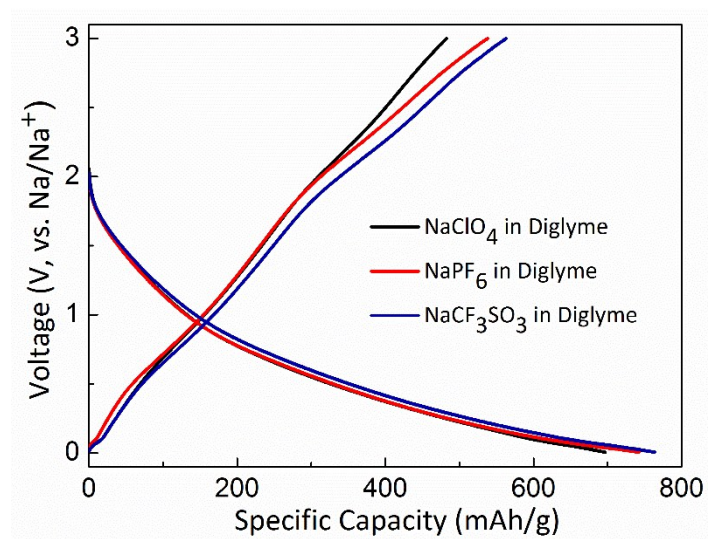

**Figure S3** The evaluation of the impact of sodium salts on electrochemical performance.

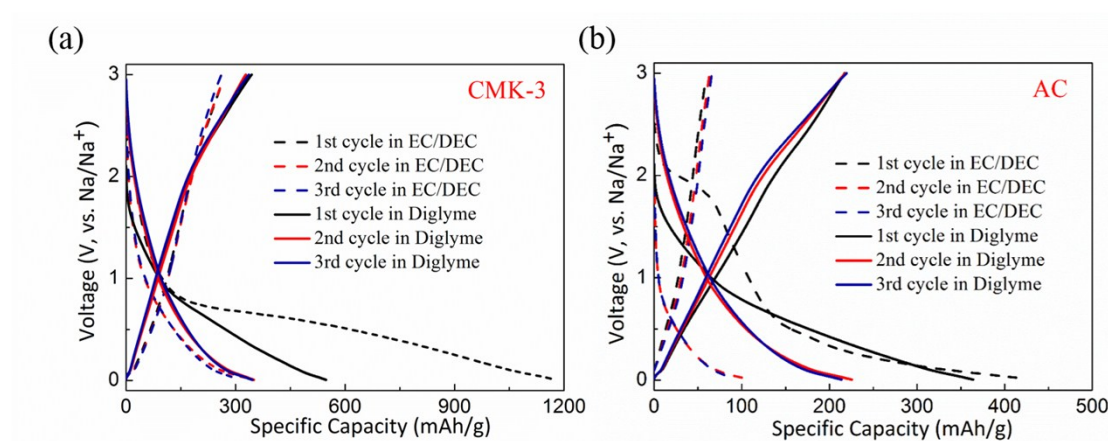

**Figure S4** (a) Galvanostatic charge-discharge profiles of the first three cycles of CMK-3 electrodes for NaOTf in EC/DEC and Diglyme at a current density of 0.1 A/g. (b) Galvanostatic charge-discharge profiles of the first three cycles of AC electrodes for NaOTf in EC/DEC and Diglyme at a current density of 0.1 A/g.

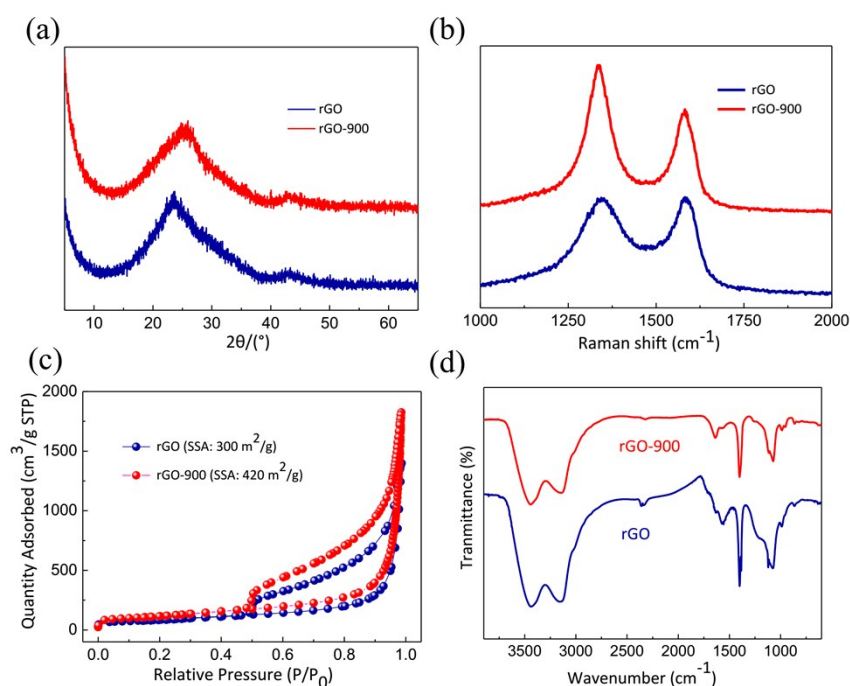

**Figure S5 Comparison of structure and surface chemistry between rGO and rGO-900 electrodes in NaOTf in Diglyme.** (a) XRD profiles, (b) N<sub>2</sub> adsorption isotherms, (c) Raman spectra and (d) FTIR spectra of rGO and rGO-900

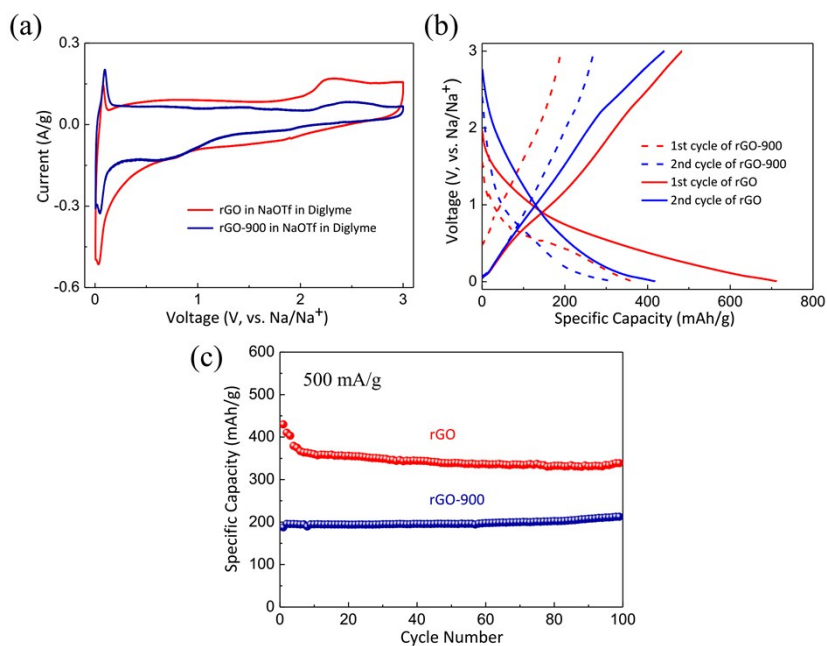

**Figure S6 Comparison of electrochemical performance between rGO and rGO-900 electrodes in NaOTf in Diglyme.** (a) CV curves of the first cycle for rGO and rGO-900 electrodes in NaOTf in Diglyme at a scanning rate of 0.2 mV/s; (b) Galvanostatic charge-discharge profiles of the first two cycles for rGO and rGO-900 electrodes in NaOTf in Diglyme at a current density of 0.1 A/g; (c) Cycling performance of 100 cycles for rGO and rGO-900 electrodes in NaOTf in Diglyme at 0.5 A/g

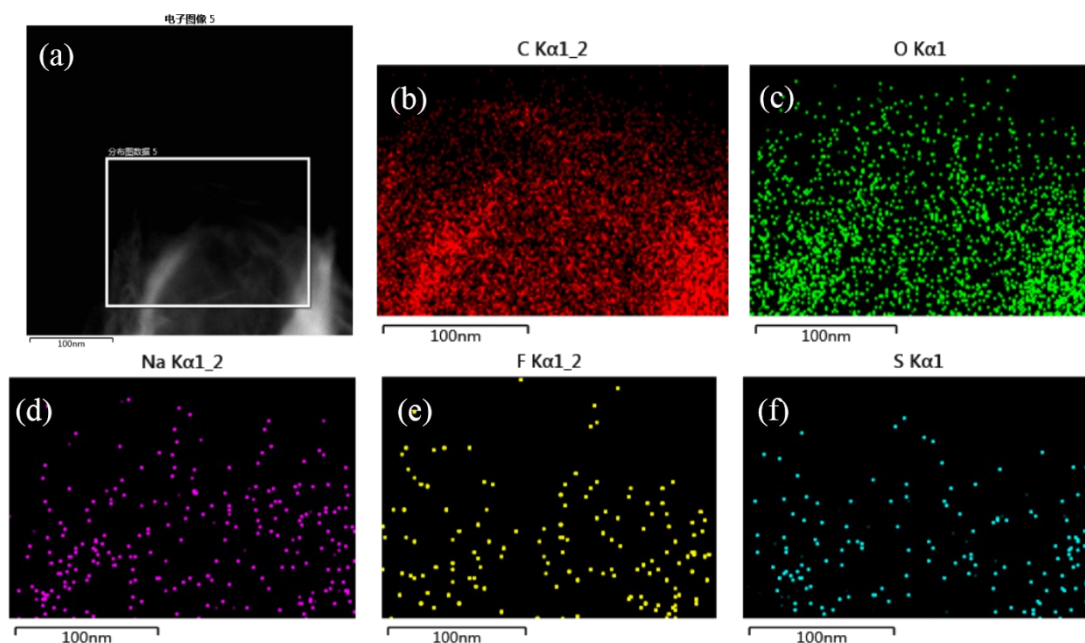

**Figure S7 Electron microscopy and elemental analysis of pristine rGO electrodes.** (a) STEM image and the corresponding EDS elemental mapping showing the spatial distribution of (b) carbon, (c) oxygen, (d) sodium, (e) fluorine and (f) sulfur.

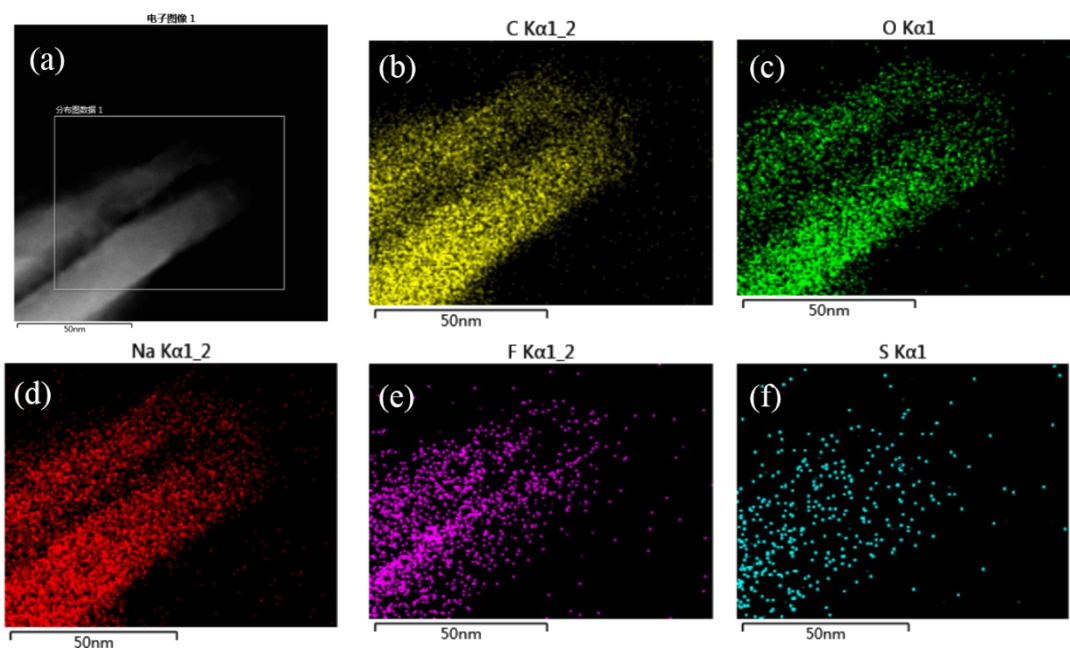

**Figure S8 Electron microscopy and elemental analysis of rGO electrodes cycled in Diglyme.** (a) STEM image and the corresponding EDS elemental mapping showing the spatial distribution of (b) carbon, (c) oxygen, (d) sodium, (e) fluorine and (f) sulfur.



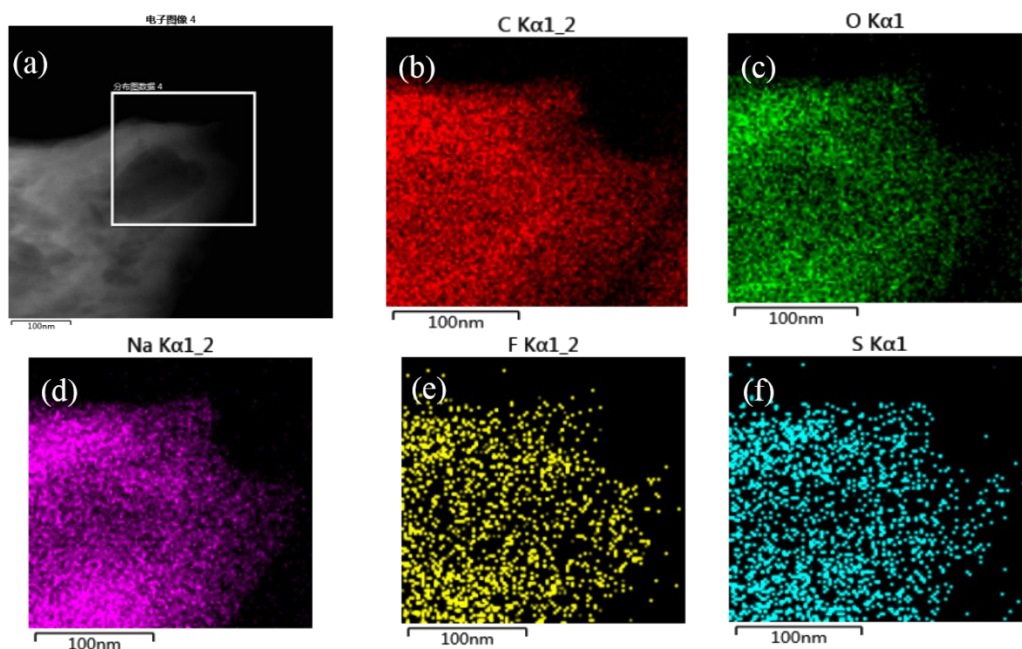

**Figure S9** Electron microscopy and elemental analysis of rGO electrodes cycled in EC/DEC. (a) STEM image and the corresponding EDS elemental mapping showing the spatial distribution of (b) carbon, (c) oxygen, (d) sodium, (e) fluorine and (f) sulfur.

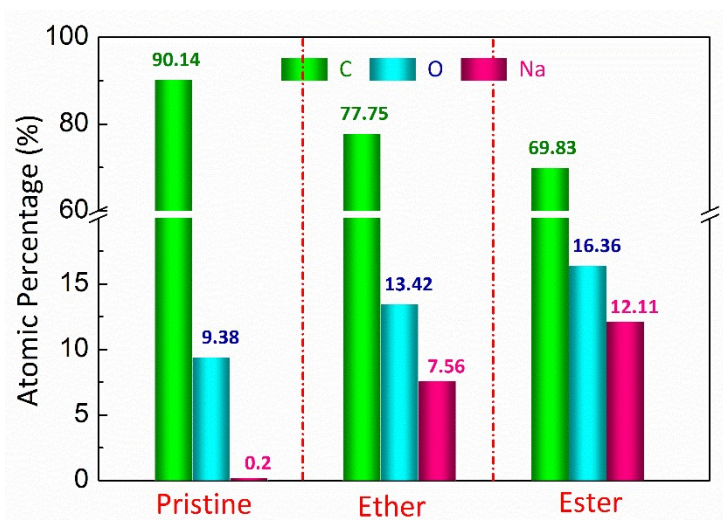

**Figure S10** Atomic percentage comparison of different elements in rGO electrodes cycled in different solvents.

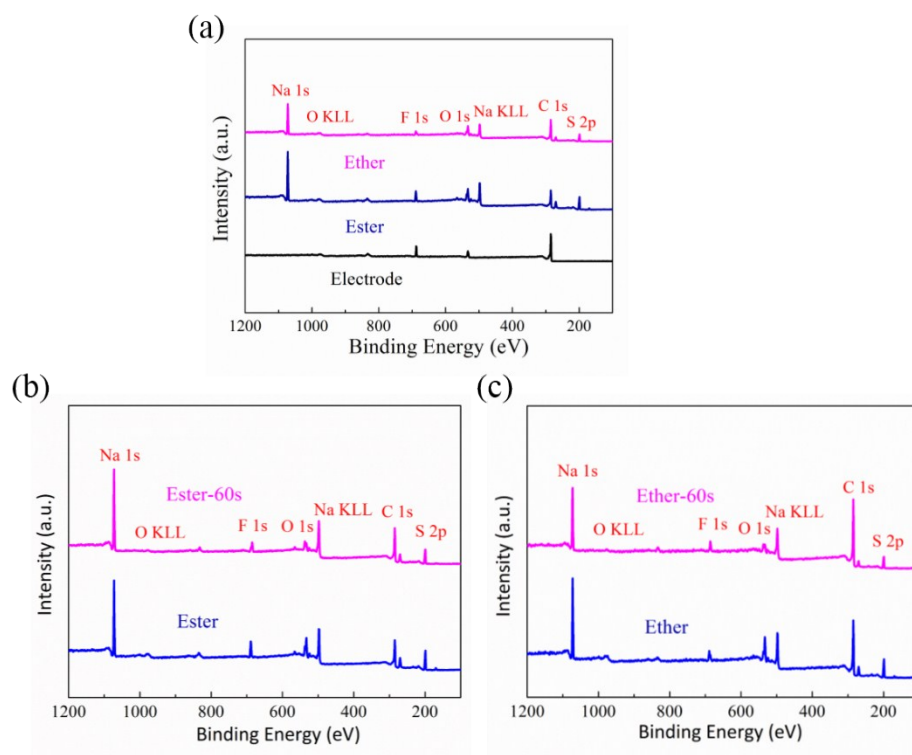

**Figure S11 XPS survey spectra of rGO electrodes cycled in different solvents and after etching.** XPS survey spectra of (a) pristine rGO electrodes, rGO electrodes cycled in Diglyme and rGO electrodes cycled in EC/DEC; (b) rGO electrodes cycled in EC/DEC and after etching, and (c) rGO electrodes cycled in Diglyme and after etching.

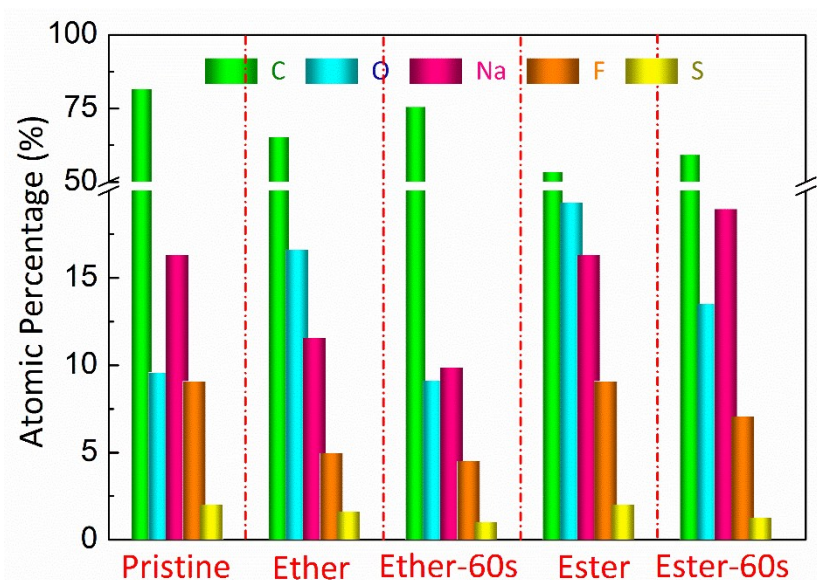

**Figure S12 Atomic percentage comparison of different elements in rGO electrodes cycled in different solvents and after etching.**

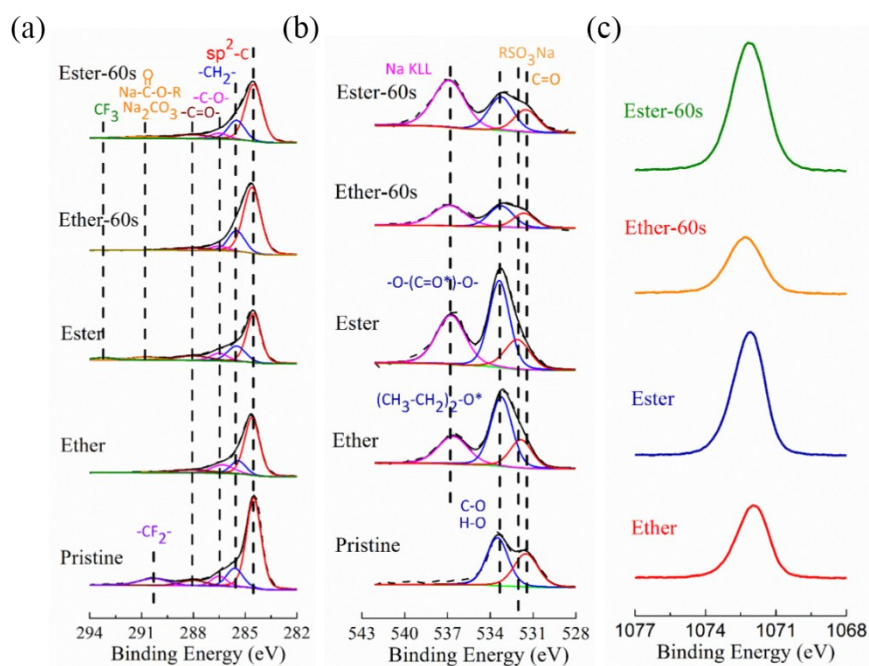

**Figure S13** XPS (a) C 1s, (b) O 1s, and (C) Na 1s survey spectra of rGO electrodes cycled in different solvents and after etching.

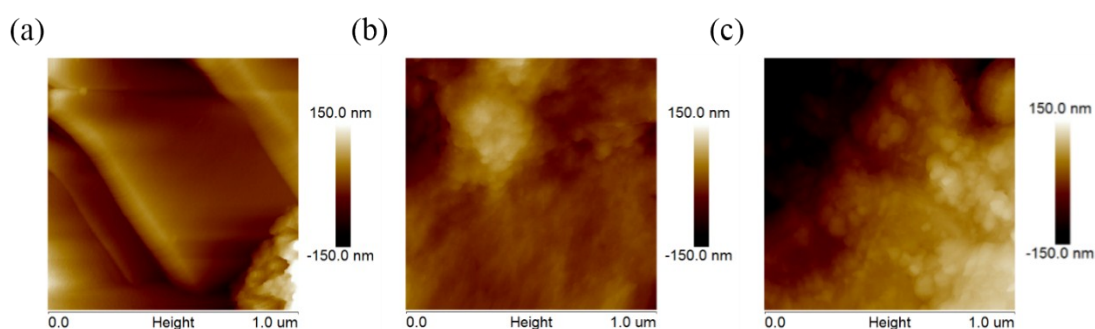

**Figure S14** AFM images of rGO electrodes cycled in different solvents. AFM images of (a) pristine rGO electrodes, (b) rGO electrodes cycled in EC/DEC, and (c) rGO electrodes cycled in Diglyme.

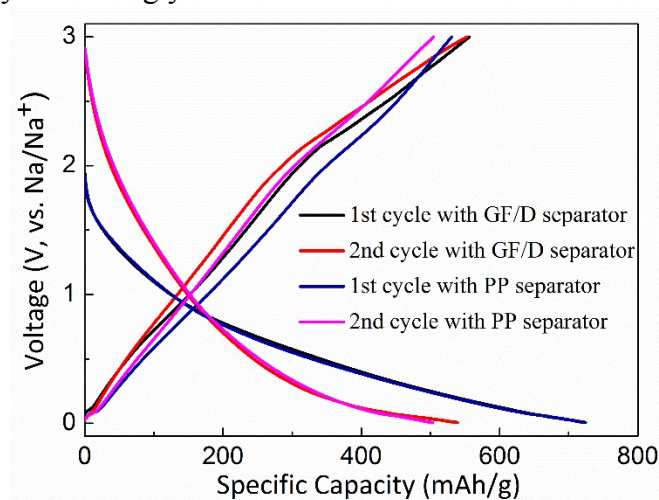

**Figure S15** Comparison of electrochemical performance with different separators.
